# Supplementary material for: Impregnation of pectin-cedarwood essential oil nanocapsules onto mini cotton bag improves larvicidal performances
Source: PubMed Central journal article supplement (PMC7445301; doi:10.1038/s41598-020-70889-z), 2020-08-24

## **Impregnation of pectin-cedarwood essential oil nanocapsules onto mini cotton bags improves larvicidal performances**

**Smriti Kala<sup>1,2\*</sup>, Nisha Sogan<sup>3</sup>, S.N Naik<sup>2</sup> Amrish Agarwal<sup>1</sup>, Jitendra Kumar<sup>1</sup>**

<sup>1</sup>Formulation Division, Institute of Pesticide Formulation Technology (IPFT), Gurugram- 122016, Haryana, India

<sup>2</sup>Center for Rural Development Technology (CRDT), Indian Institute of Technology (IIT) Delhi- 110016, India

<sup>3</sup>National Institute of Malaria Research (NIMR), Delhi-110077, India

### **Contact details of Authors:**

**Smriti Kala:** [smritikl16@gmail.com](mailto:smritikl16@gmail.com)

**S.N Naik:** [naiksatya581@gmail.com](mailto:naiksatya581@gmail.com)

**Nisha Sogan:** [nisha.singla09@gmail.com](mailto:nisha.singla09@gmail.com)

**Amrish Agarwal:** [amrish.ag@hotmail.com](mailto:amrish.ag@hotmail.com)

**Jitendra Kumar:** [jitendra.24@gmail.com](mailto:jitendra.24@gmail.com)

### **\*Author for Correspondence:**

Smriti Kala  
Scientist (Formulation)  
Institute of Pesticide Formulation Technology (IPFT)  
(Ministry of Chemicals & Fertilizers, Government of India)  
Gurugram - 122016 (Haryana) India  
Email: [smritikl16@gmail.com](mailto:smritikl16@gmail.com), [smritikl@yahoo.co.in](mailto:smritikl@yahoo.co.in)

Supplementary figure legends

Figure S1: Illustration of pesticides formulation and their handling risks

Figure S 2: Preparation of CWO loaded nanocapsules via ionic gelation and impregnation of nanocapsules on tea bag

Figure S3: Gas chromatogram of cedarwood essential oil along with chemical structures of major compounds of oil A) Alpha Himachlene B) Beta Himachlene C) Atlantone Trans-, Alpha.

Figure S4: Mechanism of adhesion of pectin nanocapsules on cotton fiber in presence of acrylate.

Figure S1:

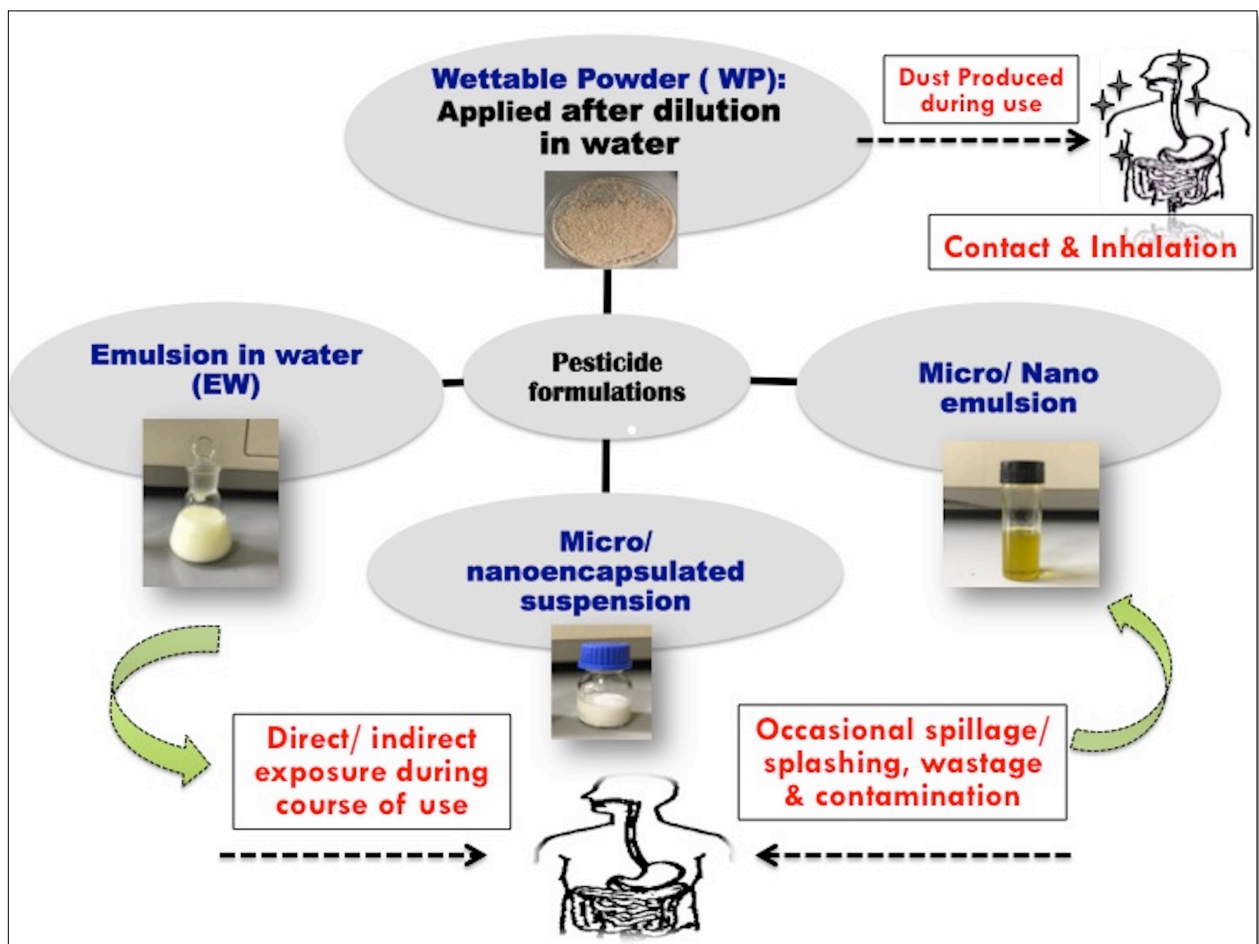

Figure S2

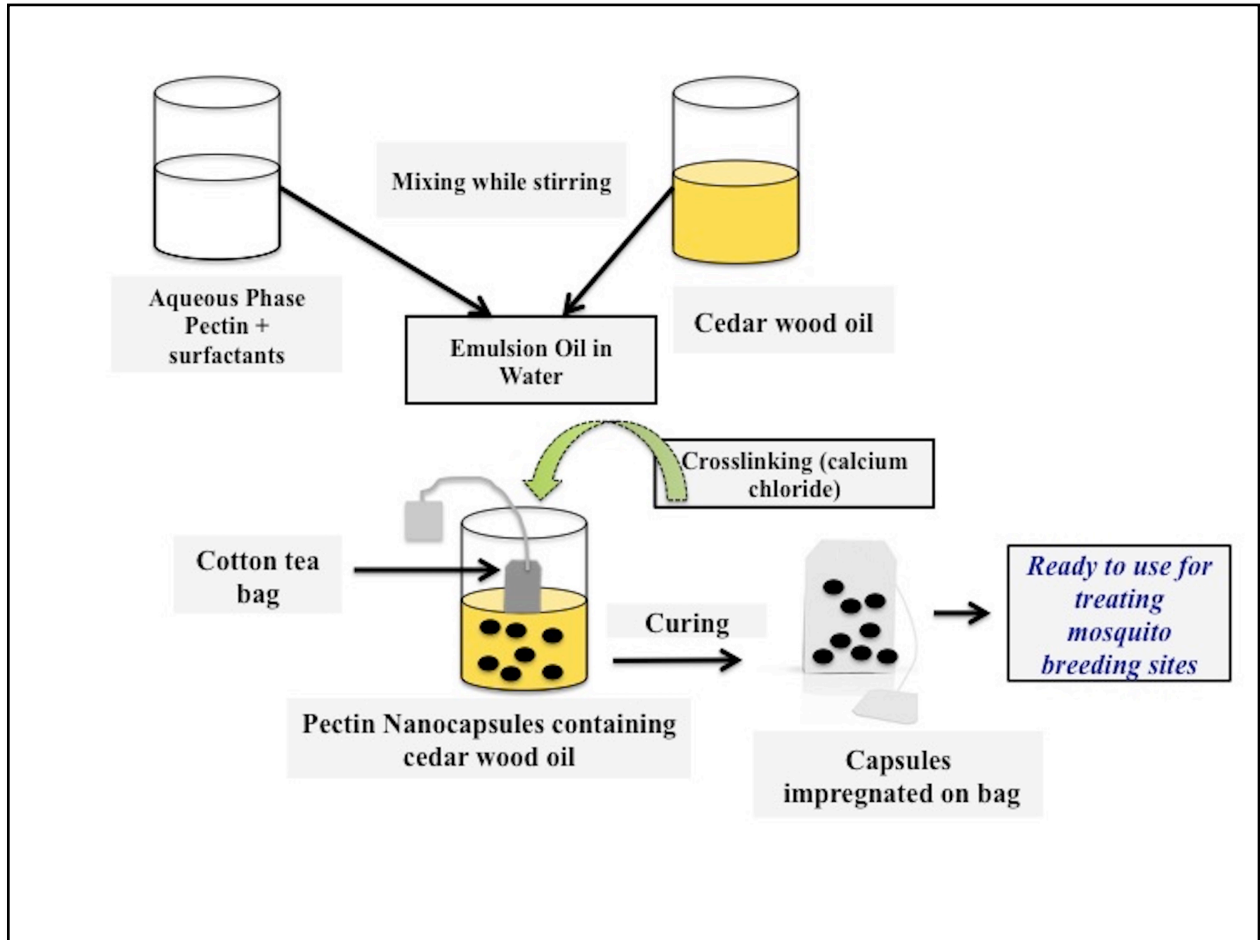

Figure S3

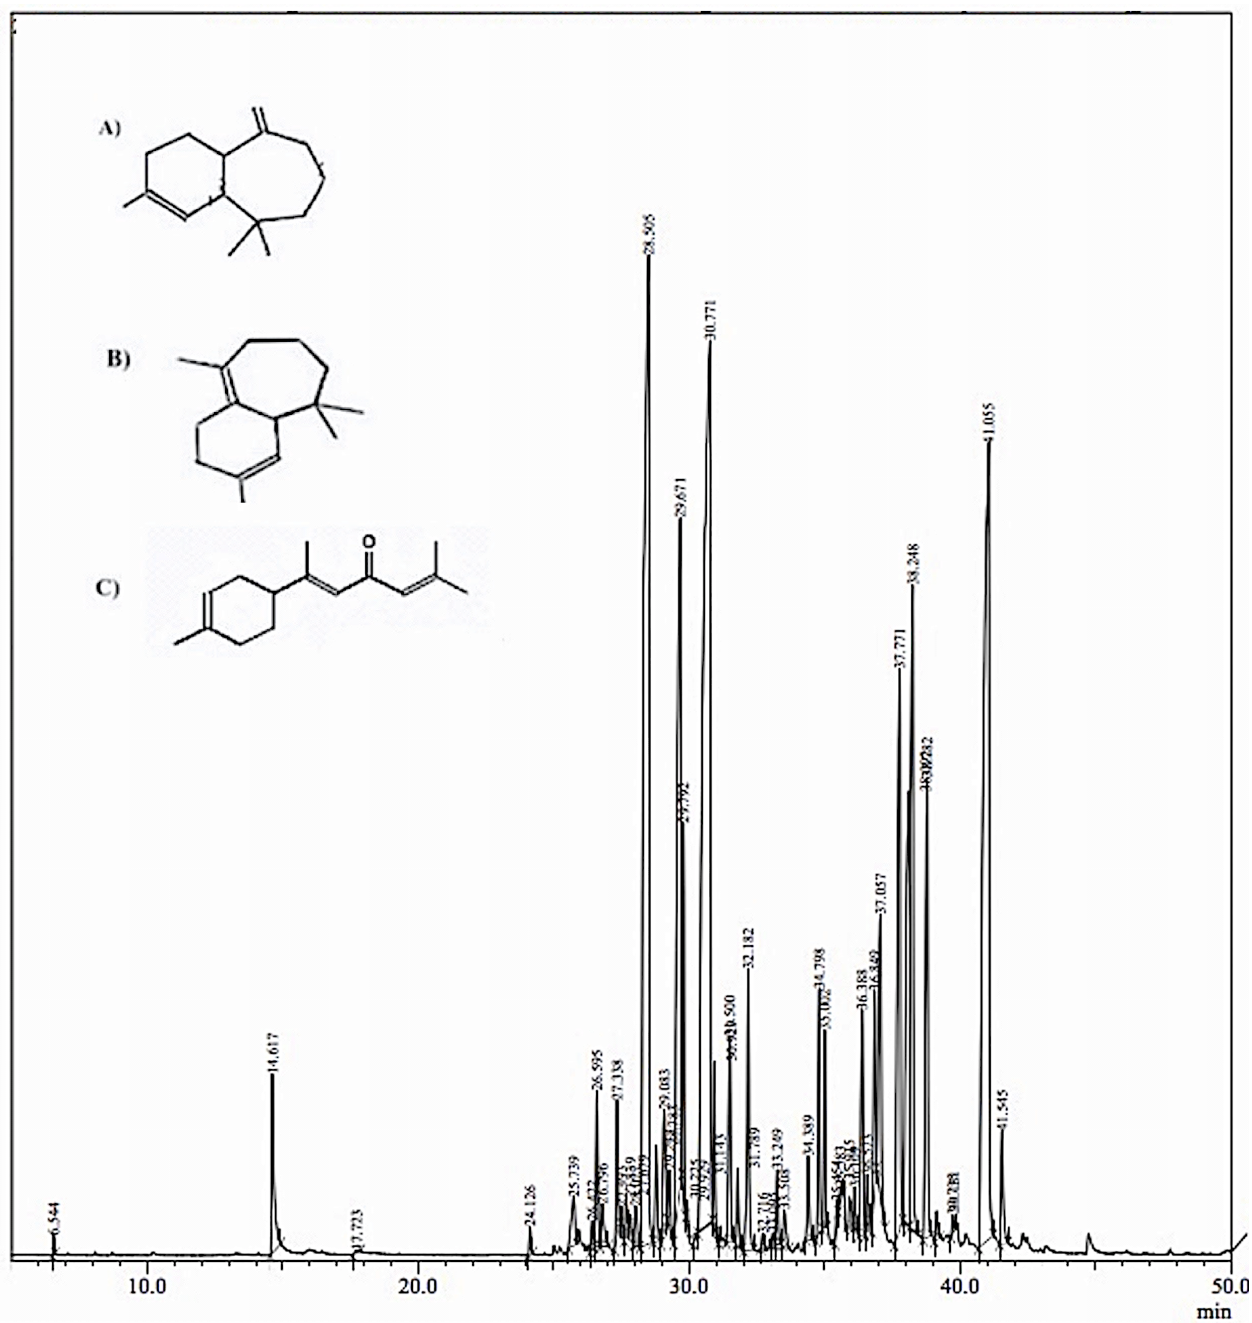

Figure S 4

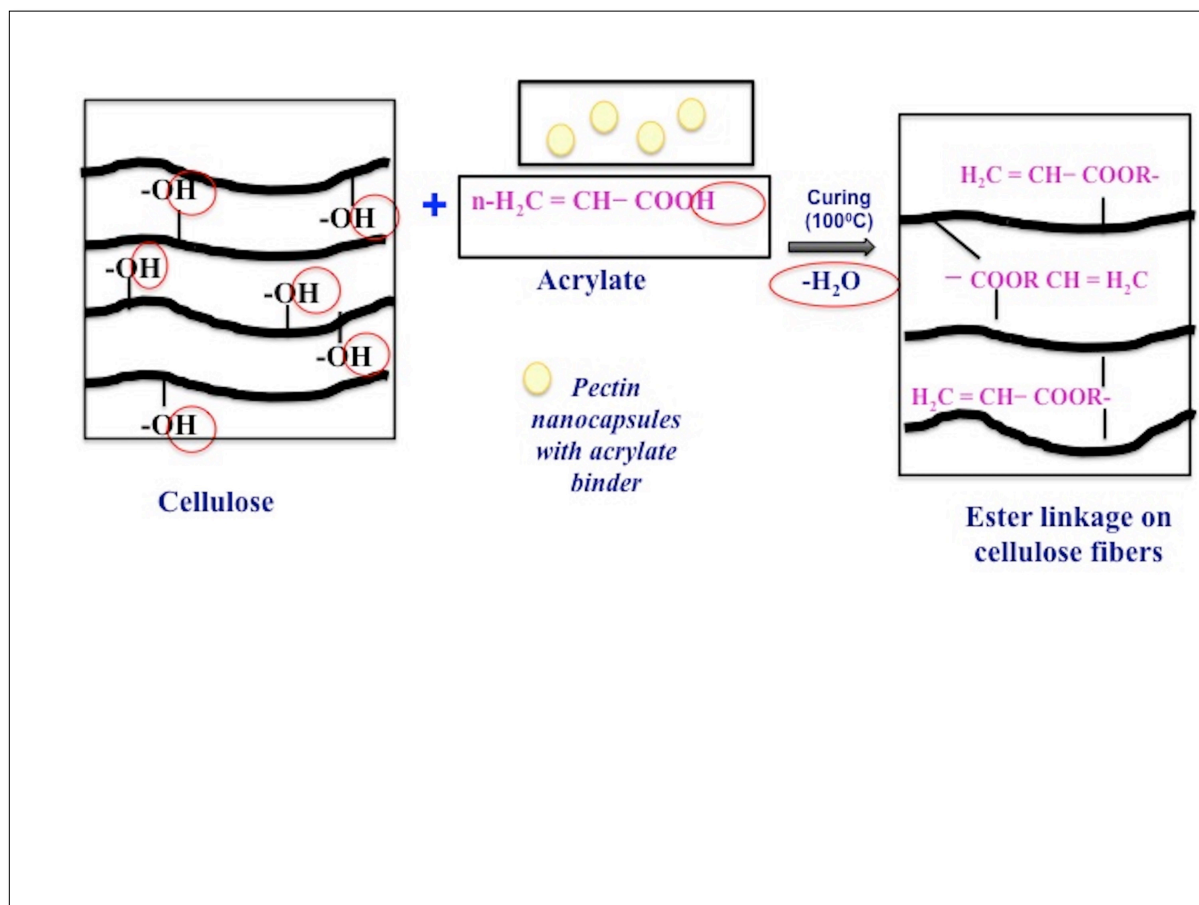

Supplement: 41598_2020_70889_MOESM1_ESM.pdf [file 41598_2020_70889_MOESM1_ESM.pdf]
